# Supplementary material for: Inferring Networks of Interdependent Labor Skills to Illuminate Urban Economic Structure
Source: PubMed Central journal article supplement (PMC7597157; doi:10.3390/e22101078), 2020-09-25
Supplement: entropy-22-01078-s001.pdf [file entropy-22-01078-s001.pdf]

# Supplementary Materials for

## Inferring networks of interdependent labor skills to illuminate urban economic structure

Shade T. Shutters<sup>1,\*</sup> and Keith Waters<sup>2</sup>

<sup>1</sup> Arizona State University; [shade.shutters@asu.edu](mailto:shade.shutters@asu.edu)

<sup>2</sup> George Mason University; [kwaters2@gmu.edu](mailto:kwaters2@gmu.edu)

\* Correspondence: [shade.shutters@asu.edu](mailto:shade.shutters@asu.edu)

### This PDF file includes:

Section S1. Further network analysis/visualizations

Section S2. Mapping of O\*NET occupation codes to BLS occupation codes

Section S3. List of MSAs and codes, NECTA exceptions, and their tightness and GDP values

Section S4. List of O\*NET elements and IWAs and their communities as identified with the Louvain community detection algorithm

Section S5. Further statistical analysis

Supplemental references

Figure S1-1. Importance Network

Table S1-1. General Network Statistics

Table S1-2. Degree Centrality – Top Five Nodes

Table S1-3. Closeness Centrality – Top Five Nodes

Table S1-4. Betweenness Centrality – Top Five Nodes

Table S3-1. Mapping of NECTAs used for BLS labor data to MSAs used for BEA GDP data

Table S3-2. Mapping of old MSA still used by BLS to current MSAs used by BEA

Table S4-1. O\*Net elements having an occupational value for level and their cluster assignment using the Louvain community detection algorithm

Table S4-2. Complete list of O\*Net individual work activities (IWAs) and their cluster as determined by the Louvain community detection algorithm

Table S5-1. Regressions Explaining MSA GDP Per Capita 2018

## S1. Further network analysis/visualizations

### Importance Network

There are two different measure of the O\*Net elements, levels and importance. Despite measuring different aspects of the elements, the resulting networks are qualitatively similar. Figure S1-1 displays the network created from the importance measure of the element. We applied the Louvain community detection algorithm (1) and, like the element network, found three communities. After removing edges less than zero, the overall network is polarized into two main groups, “sensory-physical” and “socio-cognitive” skills. As with the network created using the level measure instead of importance, the socio-cognitive lobe was found to have two sub-components illustrative of technical skills (green) and more general socio-cognitive skills (red). Sensory-physical elements are yellow.

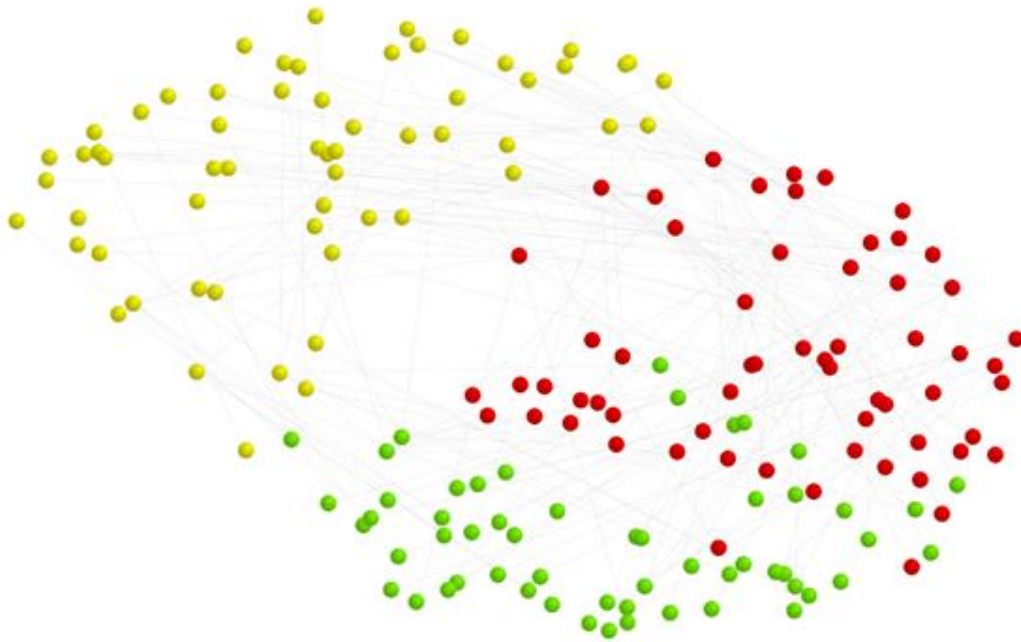

**Figure S1-1. Importance Network.** Elements are nodes with color indicating community: yellow = sensory-physical skills; green = technical socio-cognitive skills; and red = general socio-cognitive skills.

### Network Statistics

Looking at two broad measures, density and average degree, further supports that the two element networks are similar to one another and different from the IWA network (Table S1-1). Consistent with reported figures, the networks analyzed exclude edges with weights below zero. Density is the number of edges present as a share of all possible edges and average degree

is the average of how many edges each node has. The two element networks have slightly over half of all possible edge present while the IWA network has slightly under half of all possible edges present. The average degree of the element networks, however, is substantially lower than the IWA network which has substantially more nodes than the element networks.

**Table S1-1. General Network Statistics**

| Network                                 | Density (No Loops Allowed) | Average Degree |
|-----------------------------------------|----------------------------|----------------|
| Element: Level                          | 0.518                      | 82.894         |
| Element: Importance                     | 0.519                      | 91.356         |
| IWA                                     | 0.470                      | 155.494        |
| Note: Networks exclude edge weights < 0 |                            |                |

For each network, the nodes (elements or IWAs) with the highest degrees are reported in table S1-2. A nodes degree is simply the number of other nodes it is connected to. While the two element networks are visually similar to one another, the top five nodes differ with only oral comprehension appearing in both.

**Table S1-2. Degree Centrality – Top Five Nodes\***

| Rank                                                                                 | Element: Level                                              |        | Element: Importance            |        | IWA                                                                                              |        |
|--------------------------------------------------------------------------------------|-------------------------------------------------------------|--------|--------------------------------|--------|--------------------------------------------------------------------------------------------------|--------|
|                                                                                      | Element                                                     | Degree | Element                        | Degree | IWA                                                                                              | Degree |
| 1                                                                                    | Speech Clarity (1.A.4.b.5)                                  | 101    | Oral Comprehension (1.A.1.a.1) | 115    | Take physical measurements of patients or clients. (4.A.1.b.3.I05)                               | 217    |
| 2                                                                                    | Time Management (2.B.5.a)                                   | 101    | Oral Expression (1.A.1.a.3)    | 114    | Train animals. (4.A.3.a.2.I10)                                                                   | 216    |
| 3                                                                                    | Resolving Conflicts and Negotiating with Others (4.A.4.a.7) | 101    | Memorization (1.A.1.d.1)       | 114    | Assist individuals with paperwork. (4.A.4.a.5.I08)                                               | 215    |
| 4                                                                                    | Performing Administrative Activities (4.A.4.c.1)            | 101    | Speech Clarity (1.A.4.b.5)     | 114    | Consult legal materials or public records. (4.A.1.a.1.I05)                                       | 212    |
| 5                                                                                    | Oral Comprehension (1.A.1.a.1)                              | 100    | Integrity (1.C.5.c)            | 114    | Discuss legal matters with clients, disputants, or legal professionals or staff. (4.A.4.a.2.I12) | 209    |
| *Note that additional nodes share the degree score and only five are shown for each. |                                                             |        |                                |        |                                                                                                  |        |

The closeness centrality of a node is a measure of distance to all other nodes. The 5 nodes with the highest closeness centrality are reported in table S1-3. Closeness centrality for any given node is the number of nodes divided by the sum of all the shortest path lengths from that node to all other nodes. The measure ranges from zero to one with one representing a direct link to all other nodes. Closeness centrality has been identified as a measure of the ease at which a node can obtain information (2). In contrast to degree, the two element networks have three common nodes among the highest in the network: speech clarity, oral comprehension, and oral expression. Nodes in the socio-cognitive: general group account for nine of the top ten nodes in terms of element (level) closeness centrality. In stark contrast, nodes in the sensory-physical community account entirely for the nodes with the lowest closeness centrality for levels.

**Table S1-3. Closeness Centrality – Top Five Nodes\***

| Rank | Element: Level                                              |                      | Element: Importance            |                      | IWA                                                                                              |                      |
|------|-------------------------------------------------------------|----------------------|--------------------------------|----------------------|--------------------------------------------------------------------------------------------------|----------------------|
|      | Element                                                     | Closeness Centrality | Element                        | Closeness Centrality | IWA                                                                                              | Closeness Centrality |
| 1    | Resolving Conflicts and Negotiating with Others (4.A.4.a.7) | 0.730594             | Oral Comprehension (1.A.1.a.1) | 0.74262              | Take physical measurements of patients or clients. (4.A.1.b.3.I05)                               | 0.74382              |
| 2    | Time Management (2.B.5.a)                                   | 0.730594             | Oral Expression (1.A.1.a.3)    | 0.73950              | Train animals. (4.A.3.a.2.I10)                                                                   | 0.74215              |
| 3    | Speech Clarity (1.A.4.b.5)                                  | 0.727273             | Memorization (1.A.1.d.1)       | 0.73950              | Assist individuals with paperwork. (4.A.4.a.5.I08)                                               | 0.74049              |
| 4    | Oral Comprehension (1.A.1.a.1)                              | 0.727273             | Speech Clarity (1.A.4.b.5)     | 0.73950              | Consult legal materials or public records. (4.A.1.a.1.I05)                                       | 0.73556              |
| 5    | Oral Expression (1.A.1.a.3)                                 | 0.727273             | Active Listening (2.A.1.b)     | 0.73950              | Discuss legal matters with clients, disputants, or legal professionals or staff. (4.A.4.a.2.I12) | 0.73068              |

\*Note that additional nodes share the closeness centrality score and only five are shown for each.

Finally, the highest betweenness centrality scores are reported in table S1-4. Betweenness centrality measures the share of shortest paths that include the node. The highest betweenness measures are notably higher in the element networks, reflecting the polarized nature of these networks. The nodes with the highest betweenness are located at the narrow points in between the two polarized portions of the network. These are skills that may be able to bridge the gap between the polarized regions of the networks and allow workers with these skills to easily transition between the two substantially different portions of the network.

**Table S1-4. Betweenness Centrality – Top Five Nodes**

| Rank | Element: Level                                                                           |                        | Element: Importance                                                                         |                        | IWA                                                                |                        |
|------|------------------------------------------------------------------------------------------|------------------------|---------------------------------------------------------------------------------------------|------------------------|--------------------------------------------------------------------|------------------------|
|      | Element                                                                                  | Betweenness Centrality | Element                                                                                     | Betweenness Centrality | IWA                                                                | Betweenness Centrality |
| 1    | Installation (2.B.3.d)                                                                   | 0.027037               | Estimating the Quantifiable Characteristics of Products, Events, or Information (4.A.1.b.3) | 0.02209                | Assist individuals with paperwork. (4.A.4.a.5.I08)                 | 0.005192               |
| 2    | Physics (2.C.4.b)                                                                        | 0.02436                | Physics (2.C.4.b)                                                                           | 0.02131                | Train animals. (4.A.3.a.2.I10)                                     | 0.005010               |
| 3    | Coordination (2.B.1.b)                                                                   | 0.022365               | Visualization (1.A.1.f.2)                                                                   | 0.01916                | Take physical measurements of patients or clients. (4.A.1.b.3.I05) | 0.004607               |
| 4    | Drafting, Laying Out, and Specifying Technical Devices, Parts, and Equipment (4.A.3.b.2) | 0.021724               | Selective Attention (1.A.1.g.1)                                                             | 0.01702                | Engrave objects. (4.A.3.a.2.I25)                                   | 0.004560               |
| 5    | Engineering and Technology (2.C.3.b)                                                     | 0.02096                | Drafting, Laying Out, and Specifying Technical Devices, Parts, and Equipment (4.A.3.b.2)    | 0.01620                | Evaluate the quality or accuracy of data. (4.A.2.a.2.I01)          | 0.004469               |

## S2. Mapping O\*NET occupation codes to BLS occupation codes

In our analysis we paired O\*NET version 24.2 (3) with the Bureau of Labor Statistics (BLS) 2018 occupational employment statistics (4). These two entities use slightly different occupation codes. In particular, the BLS uses the federal standard 6-digit code, while O\*NET adds an extra 2-digits so that occupations may be further divided. Here we describe in detail our procedure for linking the two data sets.

With two exceptions, every O\*NET occupation code can be mapped to one BLS occupation code. In most cases, one O\*NET code maps to one and only one BLS code, as in the following example:

| O*NET code | O*Net name                       | BLS code | BLS name                         |
|------------|----------------------------------|----------|----------------------------------|
| 11-3011.00 | Administrative Services Managers | 11-3011  | Administrative Services Managers |

In some cases, multiple O\*NET occupations map to a single BLS occupation. In those cases, we take the average of an element's values across the multiple O\*NET codes and assign it to the single corresponding BLS code as in the following example:

| O*NET code | O*Net name                       | BLS code | BLS name                       |
|------------|----------------------------------|----------|--------------------------------|
| 11-3051.00 | Industrial Production Managers   | 11-3011  | Industrial Production Managers |
| 11-3051.01 | Quality Control Systems Managers |          |                                |
| 11-3051.02 | Geothermal Production Managers   |          |                                |
| 11-3051.03 | Biofuels Production Managers     |          |                                |
| 11-3051.04 | Biomass Power Plant Managers     |          |                                |

This leaves the two exceptions requiring further processing. O\*NET version 24.2 still uses one occupation code that was retired by the BLS after its 2016 data release: 25-3099 - Miscellaneous Teaching Occupations. In 2017 the BLS replaced this occupation code with two new codes, 25-3097 - Teachers and Instructors, All Other, Except Substitute Teachers, and 25-3098 - Substitute Teachers. O\*Net 24.2 continues to use the older code. Therefore, first map O\*Net values to the old BLS code 25-3099, and then apply those element averages to the two BLS occupations that replaced 25-3099, namely 25-3097 and 25-3098.

The full mapping is included in the accompanying file: `bls_onet_crosswalk_2018.csv`

### S3. Mapping Metropolitan Statistical Areas

Despite using the term metropolitan statistical area (MSA) to describe its geographical areas of aggregation, the Bureau of Labor (BLS) statistics actually uses an alternative geospatial unit in the six New England states. These units are known as New England City and Town Areas or NECTAs (5). This presents problems of matching labor data to almost every other federal data set, including GDP data we take from the U.S. Bureau of Labor Statistics (BEA). Thus, we created a mapping of areas used by the BLS to corresponding areas used by the BEA. These units have similar names but do not cover the same geographical areas. However, as we are using rates (e.g. per capita GDP) and not gross numbers, we accept these as generally applicable to their NECTA counterparts. Table S3-2 presents the metropolitan areas used by the BLS (NECTAs) to aggregate labor data and how we mapped them to metropolitan areas used by the BEA (MSAs).

**Table S3-1. Mapping of NECTAs used for BLS labor data to MSAs used for BEA GDP data**

| NECTA (BLS) |                                          | MSA (BEA) |                                       |
|-------------|------------------------------------------|-----------|---------------------------------------|
| Code        | Name                                     | Code      | Name                                  |
| 70750       | Bangor, ME                               | 12620     | Bangor, ME                            |
| 70900       | Barnstable Town, MA                      | 12700     | Barnstable Town, MA                   |
| 71650       | Boston-Cambridge-Nashua, MA-NH           | 14460     | Boston-Cambridge-Newton, MA-NH        |
| 71950       | Bridgeport-Stamford-Norwalk, CT          | 14860     | Bridgeport-Stamford-Norwalk, CT       |
| 72400       | Burlington-South Burlington, VT          | 15540     | Burlington-South Burlington, VT       |
| 72850       | Danbury, CT                              |           | *                                     |
| 73050       | Dover-Durham, NH-ME                      |           | *                                     |
| 73450       | Hartford-West Hartford-East Hartford, CT | 25540     | Hartford-East Hartford-Middletown, CT |
| 74500       | Leominster-Gardner, MA                   |           | *                                     |
| 74650       | Lewiston-Auburn, ME                      | 30340     | Lewiston-Auburn, ME                   |
| 74950       | Manchester, NH                           | 31700     | Manchester-Nashua, NH                 |
| 75550       | New Bedford, MA                          |           | *                                     |
| 75700       | New Haven, CT                            | 35300     | New Haven-Milford, CT                 |
| 76450       | Norwich-New London-Westerly, CT-RI       | 35980     | Norwich-New London, CT                |
| 76600       | Pittsfield, MA                           | 38340     | Pittsfield, MA                        |
| 76750       | Portland-South Portland, ME              | 38860     | Portland-South Portland, ME           |
| 76900       | Portsmouth, NH-ME                        |           | *                                     |
| 77200       | Providence-Warwick, RI-MA                | 39300     | Providence-Warwick, RI-MA             |
| 78100       | Springfield, MA-CT                       | 44140     | Springfield, MA                       |
| 78700       | Waterbury, CT                            |           | *                                     |
| 79600       | Worcester, MA-CT                         | 49340     | Worcester, MA-CT                      |

\* NECTA has no corresponding MSA and thus no GDP data is reported

In addition, the BLS continues to use two old MSA codes that have been renamed by Office of Management and Budget, and which are used by the BEA. Our mapping of these old to current codes is shown in Table S3-2.

**Table S3-2. Mapping of old MSA still used by BLS to current MSAs used by BEA**

| <b>Old MSA (BLS)</b> |              | <b>Current MSAs (BEA)</b> |                              |
|----------------------|--------------|---------------------------|------------------------------|
| <b>Code</b>          | <b>Name</b>  | <b>Code</b>               | <b>Name</b>                  |
| 19380                | Dayton, OH   | 19430                     | Dayton-Kettering, OH         |
| 39140                | Prescott, AZ | 39150                     | Prescott Valley-Prescott, AZ |

Finally, the BEA does not report GDP values for MSAs in Puerto Rico, thus those MSAs have labor data but no corresponding GDP data and are dropped for purposes of correlations between tightness and GDP.



#### S4. List of O\*NET elements and individual work activities (IWAs) used

The O\*Net dataset decomposes occupations into a set of attributes called elements, which are assigned values for dimensions such as importance and level. The full list of these elements is shown in Table S4-1. O\*Net additional decomposes occupations into a set of individual work activities (IWAs), which are either present or absent for each occupation. The complete list of IWAs is presented in Table S4-2. In both tables, each element’s assigned cluster, as determined by the Louvain community detection algorithm, is show.

**Table S4-1. O\*Net elements having an occupational value for level and their cluster assignment using the Louvain community detection algorithm**

| Cluster | Element id | Element name                      |
|---------|------------|-----------------------------------|
| 1       | 1.A.1.a.1  | Oral Comprehension                |
| 1       | 1.A.1.a.3  | Oral Expression                   |
| 1       | 1.A.1.a.4  | Written Expression                |
| 1       | 1.A.1.b.3  | Problem Sensitivity               |
| 1       | 1.A.1.b.5  | Inductive Reasoning               |
| 1       | 1.A.1.b.6  | Information Ordering              |
| 1       | 1.A.1.b.7  | Category Flexibility              |
| 1       | 1.A.1.d.1  | Memorization                      |
| 1       | 1.A.1.e.1  | Speed of Closure                  |
| 1       | 1.A.4.a.1  | Near Vision                       |
| 1       | 1.A.4.b.4  | Speech Recognition                |
| 1       | 1.A.4.b.5  | Speech Clarity                    |
| 1       | 2.A.1.b    | Active Listening                  |
| 1       | 2.A.1.c    | Writing                           |
| 1       | 2.A.1.d    | Speaking                          |
| 1       | 2.A.2.a    | Critical Thinking                 |
| 1       | 2.A.2.b    | Active Learning                   |
| 1       | 2.A.2.c    | Learning Strategies               |
| 1       | 2.A.2.d    | Monitoring                        |
| 1       | 2.B.1.a    | Social Perceptiveness             |
| 1       | 2.B.1.b    | Coordination                      |
| 1       | 2.B.1.c    | Persuasion                        |
| 1       | 2.B.1.d    | Negotiation                       |
| 1       | 2.B.1.e    | Instructing                       |
| 1       | 2.B.1.f    | Service Orientation               |
| 1       | 2.B.5.a    | Time Management                   |
| 1       | 2.B.5.d    | Management of Personnel Resources |
| 1       | 2.C.1.b    | Clerical                          |
| 1       | 2.C.1.d    | Sales and Marketing               |
| 1       | 2.C.1.e    | Customer and Personal Service     |
| 1       | 2.C.4.d    | Biology                           |
| 1       | 2.C.4.e    | Psychology                        |
| 1       | 2.C.4.f    | Sociology and Anthropology        |

|   |           |                                                          |
|---|-----------|----------------------------------------------------------|
| 1 | 2.C.5.a   | Medicine and Dentistry                                   |
| 1 | 2.C.5.b   | Therapy and Counseling                                   |
| 1 | 2.C.6     | Education and Training                                   |
| 1 | 2.C.7.a   | English Language                                         |
| 1 | 2.C.7.b   | Foreign Language                                         |
| 1 | 2.C.7.c   | Fine Arts                                                |
| 1 | 2.C.7.d   | History and Archeology                                   |
| 1 | 2.C.7.e   | Philosophy and Theology                                  |
| 1 | 4.A.1.b.1 | Identifying Objects, Actions, and Events                 |
| 1 | 4.A.2.b.6 | Organizing, Planning, and Prioritizing Work              |
| 1 | 4.A.4.a.4 | Establishing and Maintaining Interpersonal Relationships |
| 1 | 4.A.4.a.5 | Assisting and Caring for Others                          |
| 1 | 4.A.4.a.6 | Selling or Influencing Others                            |
| 1 | 4.A.4.a.7 | Resolving Conflicts and Negotiating with Others          |
| 1 | 4.A.4.a.8 | Performing for or Working Directly with the Public       |
| 1 | 4.A.4.b.3 | Training and Teaching Others                             |
| 1 | 4.A.4.b.5 | Coaching and Developing Others                           |
| 1 | 4.A.4.c.1 | Performing Administrative Activities                     |
| 2 | 1.A.1.a.2 | Written Comprehension                                    |
| 2 | 1.A.1.b.1 | Fluency of Ideas                                         |
| 2 | 1.A.1.b.2 | Originality                                              |
| 2 | 1.A.1.b.4 | Deductive Reasoning                                      |
| 2 | 1.A.1.c.1 | Mathematical Reasoning                                   |
| 2 | 1.A.1.c.2 | Number Facility                                          |
| 2 | 1.A.1.e.2 | Flexibility of Closure                                   |
| 2 | 2.A.1.a   | Reading Comprehension                                    |
| 2 | 2.A.1.e   | Mathematics                                              |
| 2 | 2.A.1.f   | Science                                                  |
| 2 | 2.B.2.i   | Complex Problem Solving                                  |
| 2 | 2.B.3.a   | Operations Analysis                                      |
| 2 | 2.B.3.b   | Technology Design                                        |
| 2 | 2.B.3.e   | Programming                                              |
| 2 | 2.B.4.e   | Judgment and Decision Making                             |
| 2 | 2.B.4.g   | Systems Analysis                                         |
| 2 | 2.B.4.h   | Systems Evaluation                                       |
| 2 | 2.B.5.b   | Management of Financial Resources                        |
| 2 | 2.B.5.c   | Management of Material Resources                         |
| 2 | 2.C.1.a   | Administration and Management                            |
| 2 | 2.C.1.c   | Economics and Accounting                                 |
| 2 | 2.C.1.f   | Personnel and Human Resources                            |
| 2 | 2.C.3.a   | Computers and Electronics                                |
| 2 | 2.C.3.b   | Engineering and Technology                               |
| 2 | 2.C.3.c   | Design                                                   |
| 2 | 2.C.4.a   | Mathematics                                              |
| 2 | 2.C.4.g   | Geography                                                |
| 2 | 2.C.8.b   | Law and Government                                       |
| 2 | 2.C.9.a   | Telecommunications                                       |
| 2 | 2.C.9.b   | Communications and Media                                 |
| 2 | 4.A.1.a.1 | Getting Information                                      |

|   |           |                                                                                 |
|---|-----------|---------------------------------------------------------------------------------|
| 2 | 4.A.1.b.3 | Estimating the Quantifiable Characteristics of Products, Events, or Information |
| 2 | 4.A.2.a.1 | Judging the Qualities of Things, Services, or People                            |
| 2 | 4.A.2.a.2 | Processing Information                                                          |
| 2 | 4.A.2.a.3 | Evaluating Information to Determine Compliance with Standards                   |
| 2 | 4.A.2.a.4 | Analyzing Data or Information                                                   |
| 2 | 4.A.2.b.1 | Making Decisions and Solving Problems                                           |
| 2 | 4.A.2.b.2 | Thinking Creatively                                                             |
| 2 | 4.A.2.b.3 | Updating and Using Relevant Knowledge                                           |
| 2 | 4.A.2.b.4 | Developing Objectives and Strategies                                            |
| 2 | 4.A.2.b.5 | Scheduling Work and Activities                                                  |
| 2 | 4.A.3.b.1 | Interacting With Computers                                                      |
| 2 | 4.A.3.b.6 | Documenting/Recording Information                                               |
| 2 | 4.A.4.a.1 | Interpreting the Meaning of Information for Others                              |
| 2 | 4.A.4.a.2 | Communicating with Supervisors, Peers, or Subordinates                          |
| 2 | 4.A.4.a.3 | Communicating with Persons Outside Organization                                 |
| 2 | 4.A.4.b.1 | Coordinating the Work and Activities of Others                                  |
| 2 | 4.A.4.b.2 | Developing and Building Teams                                                   |
| 2 | 4.A.4.b.4 | Guiding, Directing, and Motivating Subordinates                                 |
| 2 | 4.A.4.b.6 | Provide Consultation and Advice to Others                                       |
| 2 | 4.A.4.c.2 | Staffing Organizational Units                                                   |
| 2 | 4.A.4.c.3 | Monitoring and Controlling Resources                                            |
| 3 | 1.A.1.e.3 | Perceptual Speed                                                                |
| 3 | 1.A.1.f.1 | Spatial Orientation                                                             |
| 3 | 1.A.1.f.2 | Visualization                                                                   |
| 3 | 1.A.1.g.1 | Selective Attention                                                             |
| 3 | 1.A.1.g.2 | Time Sharing                                                                    |
| 3 | 1.A.2.a.1 | Arm-Hand Steadiness                                                             |
| 3 | 1.A.2.a.2 | Manual Dexterity                                                                |
| 3 | 1.A.2.a.3 | Finger Dexterity                                                                |
| 3 | 1.A.2.b.1 | Control Precision                                                               |
| 3 | 1.A.2.b.2 | Multilimb Coordination                                                          |
| 3 | 1.A.2.b.3 | Response Orientation                                                            |
| 3 | 1.A.2.b.4 | Rate Control                                                                    |
| 3 | 1.A.2.c.1 | Reaction Time                                                                   |
| 3 | 1.A.2.c.2 | Wrist-Finger Speed                                                              |
| 3 | 1.A.2.c.3 | Speed of Limb Movement                                                          |
| 3 | 1.A.3.a.1 | Static Strength                                                                 |
| 3 | 1.A.3.a.2 | Explosive Strength                                                              |
| 3 | 1.A.3.a.3 | Dynamic Strength                                                                |
| 3 | 1.A.3.a.4 | Trunk Strength                                                                  |
| 3 | 1.A.3.b.1 | Stamina                                                                         |
| 3 | 1.A.3.c.1 | Extent Flexibility                                                              |
| 3 | 1.A.3.c.2 | Dynamic Flexibility                                                             |
| 3 | 1.A.3.c.3 | Gross Body Coordination                                                         |
| 3 | 1.A.3.c.4 | Gross Body Equilibrium                                                          |
| 3 | 1.A.4.a.2 | Far Vision                                                                      |
| 3 | 1.A.4.a.3 | Visual Color Discrimination                                                     |
| 3 | 1.A.4.a.4 | Night Vision                                                                    |
| 3 | 1.A.4.a.5 | Peripheral Vision                                                               |

|   |           |                                                                              |
|---|-----------|------------------------------------------------------------------------------|
| 3 | 1.A.4.a.6 | Depth Perception                                                             |
| 3 | 1.A.4.a.7 | Glare Sensitivity                                                            |
| 3 | 1.A.4.b.1 | Hearing Sensitivity                                                          |
| 3 | 1.A.4.b.2 | Auditory Attention                                                           |
| 3 | 1.A.4.b.3 | Sound Localization                                                           |
| 3 | 2.B.3.c   | Equipment Selection                                                          |
| 3 | 2.B.3.d   | Installation                                                                 |
| 3 | 2.B.3.g   | Operation Monitoring                                                         |
| 3 | 2.B.3.h   | Operation and Control                                                        |
| 3 | 2.B.3.j   | Equipment Maintenance                                                        |
| 3 | 2.B.3.k   | Troubleshooting                                                              |
| 3 | 2.B.3.l   | Repairing                                                                    |
| 3 | 2.B.3.m   | Quality Control Analysis                                                     |
| 3 | 2.C.10    | Transportation                                                               |
| 3 | 2.C.2.a   | Production and Processing                                                    |
| 3 | 2.C.2.b   | Food Production                                                              |
| 3 | 2.C.3.d   | Building and Construction                                                    |
| 3 | 2.C.3.e   | Mechanical                                                                   |
| 3 | 2.C.4.b   | Physics                                                                      |
| 3 | 2.C.4.c   | Chemistry                                                                    |
| 3 | 2.C.8.a   | Public Safety and Security                                                   |
| 3 | 4.A.1.a.2 | Monitor Processes, Materials, or Surroundings                                |
| 3 | 4.A.1.b.2 | Inspecting Equipment, Structures, or Material                                |
| 3 | 4.A.3.a.1 | Performing General Physical Activities                                       |
| 3 | 4.A.3.a.2 | Handling and Moving Objects                                                  |
| 3 | 4.A.3.a.3 | Controlling Machines and Processes                                           |
| 3 | 4.A.3.a.4 | Operating Vehicles, Mechanized Devices, or Equipment                         |
| 3 | 4.A.3.b.2 | Drafting, Laying Out, and Specifying Technical Devices, Parts, and Equipment |
| 3 | 4.A.3.b.4 | Repairing and Maintaining Mechanical Equipment                               |
| 3 | 4.A.3.b.5 | Repairing and Maintaining Electronic Equipment                               |

**Table S4-2. Complete list of O\*Net individual work activities (IWAs) and their cluster as determined by the Louvain community detection algorithm.**

| Cluster | IWA ID        | IWA name                                                            |
|---------|---------------|---------------------------------------------------------------------|
| 1       | 4.A.1.a.1.I02 | Read documents or materials to inform work processes.               |
| 1       | 4.A.1.a.2.I01 | Monitor equipment operation.                                        |
| 1       | 4.A.1.a.2.I02 | Monitor operations to ensure adequate performance.                  |
| 1       | 4.A.1.b.1.I01 | Mark materials or objects for identification.                       |
| 1       | 4.A.1.b.2.I03 | Test characteristics of materials or products.                      |
| 1       | 4.A.1.b.2.I04 | Inspect vehicles.                                                   |
| 1       | 4.A.1.b.2.I05 | Inspect facilities or equipment.                                    |
| 1       | 4.A.1.b.2.I06 | Inspect completed work or finished products.                        |
| 1       | 4.A.1.b.2.I07 | Inspect commercial, industrial, or production systems or equipment. |
| 1       | 4.A.1.b.2.I10 | Inspect characteristics or conditions of materials or products.     |
| 1       | 4.A.1.b.2.I11 | Test sites or materials for environmental hazards.                  |

|   |               |                                                                                  |
|---|---------------|----------------------------------------------------------------------------------|
| 1 | 4.A.1.b.2.I12 | Test performance of equipment or systems.                                        |
| 1 | 4.A.1.b.3.I01 | Measure physical characteristics of materials, products, or equipment.           |
| 1 | 4.A.1.b.3.I04 | Assess characteristics of land or property.                                      |
| 1 | 4.A.2.a.1.I05 | Evaluate production inputs or outputs.                                           |
| 1 | 4.A.2.a.2.I02 | Sort materials or products.                                                      |
| 1 | 4.A.2.b.1.I02 | Diagnose system or equipment problems.                                           |
| 1 | 4.A.2.b.1.I04 | Determine operational methods or procedures.                                     |
| 1 | 4.A.2.b.1.I10 | Select materials or equipment for operations or projects.                        |
| 1 | 4.A.2.b.2.I13 | Design materials or devices.                                                     |
| 1 | 4.A.2.b.2.I14 | Design industrial systems or equipment.                                          |
| 1 | 4.A.2.b.6.I02 | Plan work activities.                                                            |
| 1 | 4.A.3.a.1.I01 | Prepare mixtures or solutions.                                                   |
| 1 | 4.A.3.a.1.I03 | Clean tools, equipment, facilities, or work areas.                               |
| 1 | 4.A.3.a.1.I04 | Set up protective structures or coverings near work areas.                       |
| 1 | 4.A.3.a.1.I05 | Dispose of waste or debris.                                                      |
| 1 | 4.A.3.a.1.I06 | Load products, materials, or equipment for transportation or further processing. |
| 1 | 4.A.3.a.1.I07 | Perform general construction or extraction activities.                           |
| 1 | 4.A.3.a.1.I08 | Clean workpieces, finished products, or other objects.                           |
| 1 | 4.A.3.a.1.I10 | Move materials, equipment, or supplies.                                          |
| 1 | 4.A.3.a.2.I01 | Build structures.                                                                |
| 1 | 4.A.3.a.2.I02 | Collect samples of products or materials.                                        |
| 1 | 4.A.3.a.2.I04 | Assemble equipment or components.                                                |
| 1 | 4.A.3.a.2.I05 | Sew garments or materials.                                                       |
| 1 | 4.A.3.a.2.I06 | Position workpieces or materials on equipment.                                   |
| 1 | 4.A.3.a.2.I07 | Shape materials to create products.                                              |
| 1 | 4.A.3.a.2.I09 | Adjust equipment to ensure adequate performance.                                 |
| 1 | 4.A.3.a.2.I12 | Cut materials.                                                                   |
| 1 | 4.A.3.a.2.I13 | Prepare industrial materials for processing or use.                              |
| 1 | 4.A.3.a.2.I15 | Smooth surfaces of objects or equipment.                                         |
| 1 | 4.A.3.a.2.I16 | Install energy or heating equipment.                                             |
| 1 | 4.A.3.a.2.I19 | Disassemble equipment.                                                           |
| 1 | 4.A.3.a.2.I20 | Install commercial or production equipment.                                      |
| 1 | 4.A.3.a.2.I22 | Position tools or equipment.                                                     |
| 1 | 4.A.3.a.2.I23 | Tend watercraft.                                                                 |
| 1 | 4.A.3.a.2.I25 | Engrave objects.                                                                 |
| 1 | 4.A.3.a.2.I26 | Embalm corpses.                                                                  |
| 1 | 4.A.3.a.2.I27 | Fabricate devices or components.                                                 |
| 1 | 4.A.3.a.2.I28 | Create decorative objects or parts of objects.                                   |
| 1 | 4.A.3.a.2.I29 | Process animal carcasses.                                                        |
| 1 | 4.A.3.a.2.I30 | Drill holes in earth or materials.                                               |
| 1 | 4.A.3.a.2.I33 | Apply protective solutions or coatings.                                          |
| 1 | 4.A.3.a.2.I34 | Connect components or supply lines to equipment or tools.                        |
| 1 | 4.A.3.a.2.I35 | Join parts using soldering, welding, or brazing techniques.                      |
| 1 | 4.A.3.a.2.I36 | Assemble products or work aids.                                                  |
| 1 | 4.A.3.a.2.I39 | Apply materials to fill gaps or imperfections.                                   |
| 1 | 4.A.3.a.2.I40 | Remove workpieces from production equipment.                                     |

|   |               |                                                                |
|---|---------------|----------------------------------------------------------------|
| 1 | 4.A.3.a.2.I41 | Position materials or components for assembly.                 |
| 1 | 4.A.3.a.2.I42 | Package objects.                                               |
| 1 | 4.A.3.a.2.I43 | Install plumbing or piping equipment or systems.               |
| 1 | 4.A.3.a.2.I45 | Apply decorative finishes.                                     |
| 1 | 4.A.3.a.2.I46 | Set up equipment.                                              |
| 1 | 4.A.3.a.3.I02 | Operate pumping systems or equipment.                          |
| 1 | 4.A.3.a.3.I03 | Operate construction or excavation equipment.                  |
| 1 | 4.A.3.a.3.I06 | Operate industrial processing or production equipment.         |
| 1 | 4.A.3.a.3.I07 | Operate energy production or distribution equipment.           |
| 1 | 4.A.3.a.3.I08 | Operate lifting or moving equipment.                           |
| 1 | 4.A.3.a.3.I12 | Operate cutting or grinding equipment.                         |
| 1 | 4.A.3.a.4.I01 | Operate transportation equipment or vehicles.                  |
| 1 | 4.A.3.b.4.I01 | Maintain facilities or equipment.                              |
| 1 | 4.A.3.b.4.I02 | Maintain tools or equipment.                                   |
| 1 | 4.A.3.b.4.I03 | Repair electrical or electronic equipment.                     |
| 1 | 4.A.3.b.4.I05 | Repair workpieces or products.                                 |
| 1 | 4.A.3.b.4.I06 | Repair tools or equipment.                                     |
| 1 | 4.A.3.b.4.I07 | Repair vehicle components.                                     |
| 1 | 4.A.3.b.4.I08 | Maintain vehicles in working condition.                        |
| 1 | 4.A.3.b.6.I08 | Maintain operational records.                                  |
| 1 | 4.A.4.a.2.I03 | Communicate with others about operational plans or activities. |
| 1 | 4.A.4.a.2.I08 | Notify others of emergencies or problems.                      |
| 1 | 4.A.4.a.2.I10 | Signal others to coordinate work activities.                   |
| 1 | 4.A.4.a.8.I02 | Conduct amusement or gaming activities.                        |
| 2 | 4.A.1.a.1.I01 | Study details of artistic productions.                         |
| 2 | 4.A.1.a.1.I03 | Investigate criminal or legal matters.                         |
| 2 | 4.A.1.a.1.I05 | Consult legal materials or public records.                     |
| 2 | 4.A.1.a.1.I11 | Gather information for news stories.                           |
| 2 | 4.A.1.a.1.I14 | Collect data about consumer needs or opinions.                 |
| 2 | 4.A.1.a.1.I15 | Investigate individuals' background, behavior, or activities.  |
| 2 | 4.A.1.a.1.I23 | Interview people to obtain information.                        |
| 2 | 4.A.1.a.2.I04 | Monitor traffic conditions.                                    |
| 2 | 4.A.1.a.2.I08 | Monitor external affairs, trends, or events.                   |
| 2 | 4.A.1.b.3.I03 | Calculate financial data.                                      |
| 2 | 4.A.1.b.3.I05 | Take physical measurements of patients or clients.             |
| 2 | 4.A.2.a.1.I02 | Evaluate programs, practices, or processes.                    |
| 2 | 4.A.2.a.1.I04 | Evaluate personnel capabilities or performance.                |
| 2 | 4.A.2.a.1.I08 | Evaluate scholarly work.                                       |
| 2 | 4.A.2.a.2.I01 | Evaluate the quality or accuracy of data.                      |
| 2 | 4.A.2.a.2.I03 | Compile records, documentation, or other data.                 |
| 2 | 4.A.2.a.3.I03 | Examine financial activities, operations, or systems.          |
| 2 | 4.A.2.a.4.I08 | Research laws, precedents, or other legal data.                |
| 2 | 4.A.2.b.1.I05 | Make legal decisions.                                          |
| 2 | 4.A.2.b.1.I07 | Edit written materials or documents.                           |
| 2 | 4.A.2.b.1.I11 | Alter audio or video recordings.                               |
| 2 | 4.A.2.b.2.I22 | Develop news, entertainment, or artistic content.              |

|   |               |                                                                                    |
|---|---------------|------------------------------------------------------------------------------------|
| 2 | 4.A.2.b.2.I25 | Create artistic designs or performances.                                           |
| 2 | 4.A.2.b.4.I02 | Draft legislation or regulations.                                                  |
| 2 | 4.A.2.b.6.I01 | Plan events or programs.                                                           |
| 2 | 4.A.3.a.1.I14 | Climb equipment or structures.                                                     |
| 2 | 4.A.3.a.2.I21 | Apply hygienic or cosmetic agents to skin or hair.                                 |
| 2 | 4.A.3.a.2.I31 | Groom or style hair.                                                               |
| 2 | 4.A.3.b.1.I06 | Process digital or online data.                                                    |
| 2 | 4.A.3.b.6.I02 | Record information about legal matters.                                            |
| 2 | 4.A.3.b.6.I12 | Prepare informational or instructional materials.                                  |
| 2 | 4.A.3.b.6.I16 | Write material for artistic or commercial purposes.                                |
| 2 | 4.A.4.a.1.I02 | Explain regulations, policies, or procedures.                                      |
| 2 | 4.A.4.a.1.I03 | Interpret language, cultural, or religious information for others.                 |
| 2 | 4.A.4.a.1.I04 | Explain financial information.                                                     |
| 2 | 4.A.4.a.2.I12 | Discuss legal matters with clients, disputants, or legal professionals or staff.   |
| 2 | 4.A.4.a.3.I01 | Present information in legal proceedings.                                          |
| 2 | 4.A.4.a.5.I05 | Intervene in crisis situations or emergencies.                                     |
| 2 | 4.A.4.a.5.I08 | Assist individuals with paperwork.                                                 |
| 2 | 4.A.4.a.6.I03 | Promote products, services, or programs.                                           |
| 2 | 4.A.4.a.7.I01 | Mediate disputes.                                                                  |
| 2 | 4.A.4.a.8.I01 | Present arts or entertainment performances.                                        |
| 2 | 4.A.4.b.4.I03 | Coordinate artistic or entertainment activities.                                   |
| 2 | 4.A.4.b.4.I12 | Direct organizational operations, activities, or procedures.                       |
| 2 | 4.A.4.b.4.I15 | Direct security or safety activities or operations.                                |
| 2 | 4.A.4.b.5.I01 | Coach others.                                                                      |
| 2 | 4.A.4.c.2.I02 | Perform human resources activities.                                                |
| 3 | 4.A.1.a.1.I04 | Gather information from physical or electronic sources.                            |
| 3 | 4.A.1.a.1.I12 | Collect information about patients or clients.                                     |
| 3 | 4.A.1.a.1.I18 | Research historical or social issues.                                              |
| 3 | 4.A.1.a.1.I19 | Research healthcare issues.                                                        |
| 3 | 4.A.1.a.1.I21 | Investigate incidents or accidents.                                                |
| 3 | 4.A.1.a.2.I03 | Monitor financial data or activities.                                              |
| 3 | 4.A.1.a.2.I05 | Monitor health conditions of humans or animals.                                    |
| 3 | 4.A.1.a.2.I06 | Monitor individual behavior or performance.                                        |
| 3 | 4.A.1.a.2.I07 | Monitor safety or security of work areas, facilities, or properties.               |
| 3 | 4.A.1.b.2.I01 | Administer diagnostic tests to assess patient health.                              |
| 3 | 4.A.1.b.2.I09 | Examine people or animals to assess health conditions or physical characteristics. |
| 3 | 4.A.2.a.1.I01 | Assess living, work, or social needs or status of individuals or communities.      |
| 3 | 4.A.2.a.1.I03 | Assess student capabilities, needs, or performance.                                |
| 3 | 4.A.2.a.1.I06 | Evaluate patient or client condition or treatment options.                         |
| 3 | 4.A.2.a.2.I04 | Reconcile financial data.                                                          |
| 3 | 4.A.2.a.3.I01 | Examine materials or documentation for accuracy or compliance.                     |
| 3 | 4.A.2.a.3.I04 | Follow standard healthcare safety procedures to protect patient and staff members. |
| 3 | 4.A.2.a.4.I06 | Analyze health or medical data.                                                    |
| 3 | 4.A.2.b.1.I01 | Determine values or prices of goods or services.                                   |
| 3 | 4.A.2.b.1.I06 | Diagnose health conditions or disorders.                                           |
| 3 | 4.A.2.b.2.I01 | Develop patient or client care or treatment plans.                                 |

|   |               |                                                                                  |
|---|---------------|----------------------------------------------------------------------------------|
| 3 | 4.A.2.b.2.I04 | Develop recipes or menus.                                                        |
| 3 | 4.A.2.b.2.I05 | Develop safety standards, policies, or procedures.                               |
| 3 | 4.A.2.b.2.I10 | Develop health assessment methods or programs.                                   |
| 3 | 4.A.2.b.2.I15 | Develop educational programs, plans, or procedures.                              |
| 3 | 4.A.2.b.2.I17 | Develop public or community health programs.                                     |
| 3 | 4.A.2.b.2.I27 | Develop organizational or program goals or objectives.                           |
| 3 | 4.A.2.b.5.I01 | Prepare schedules for services or facilities.                                    |
| 3 | 4.A.2.b.5.I02 | Schedule operational activities.                                                 |
| 3 | 4.A.2.b.5.I03 | Schedule appointments.                                                           |
| 3 | 4.A.3.a.1.I02 | Protect people or property from threats such as fires or flooding.               |
| 3 | 4.A.3.a.1.I09 | Clean medical equipment or facilities.                                           |
| 3 | 4.A.3.a.1.I11 | Maintain safety or security.                                                     |
| 3 | 4.A.3.a.1.I12 | Escort others.                                                                   |
| 3 | 4.A.3.a.1.I13 | Transport patients or clients.                                                   |
| 3 | 4.A.3.a.1.I15 | Provide food or beverage services.                                               |
| 3 | 4.A.3.a.1.I16 | Perform athletic activities for fitness, competition, or artistic purposes.      |
| 3 | 4.A.3.a.1.I17 | Perform agricultural activities.                                                 |
| 3 | 4.A.3.a.2.I03 | Prepare foods or beverages.                                                      |
| 3 | 4.A.3.a.2.I08 | Arrange displays or decorations.                                                 |
| 3 | 4.A.3.a.2.I10 | Train animals.                                                                   |
| 3 | 4.A.3.a.2.I11 | Prepare medical equipment or work areas for use.                                 |
| 3 | 4.A.3.a.2.I14 | Cut trees or other vegetation.                                                   |
| 3 | 4.A.3.a.2.I17 | Fabricate medical devices.                                                       |
| 3 | 4.A.3.a.2.I18 | Direct vehicle traffic.                                                          |
| 3 | 4.A.3.a.2.I24 | Adjust medical equipment to ensure adequate performance.                         |
| 3 | 4.A.3.a.2.I32 | Set up classrooms, facilities, educational materials, or equipment.              |
| 3 | 4.A.3.a.2.I37 | Stock supplies or products.                                                      |
| 3 | 4.A.3.a.2.I38 | Collect environmental or biological samples.                                     |
| 3 | 4.A.3.a.2.I44 | Hunt animals.                                                                    |
| 3 | 4.A.3.a.2.I47 | Prepare specimens or materials for testing.                                      |
| 3 | 4.A.3.a.3.I01 | Operate office equipment.                                                        |
| 3 | 4.A.3.a.3.I04 | Operate medical equipment.                                                       |
| 3 | 4.A.3.a.3.I05 | Operate audiovisual or related equipment.                                        |
| 3 | 4.A.3.a.3.I10 | Operate communications equipment or systems.                                     |
| 3 | 4.A.3.a.3.I11 | Operate agricultural or forestry equipment.                                      |
| 3 | 4.A.3.b.1.I05 | Operate computer systems or computerized equipment.                              |
| 3 | 4.A.3.b.4.I09 | Maintain medical equipment or instruments.                                       |
| 3 | 4.A.3.b.6.I04 | Record information about environmental conditions.                               |
| 3 | 4.A.3.b.6.I05 | Record images with photographic or audiovisual equipment.                        |
| 3 | 4.A.3.b.6.I06 | Prepare health or medical documents.                                             |
| 3 | 4.A.3.b.6.I10 | Maintain sales or financial records.                                             |
| 3 | 4.A.3.b.6.I11 | Maintain health or medical records.                                              |
| 3 | 4.A.3.b.6.I13 | Prepare documentation for contracts, applications, or permits.                   |
| 3 | 4.A.4.a.1.I01 | Explain technical details of products or services.                               |
| 3 | 4.A.4.a.1.I05 | Explain medical information to patients or family members.                       |
| 3 | 4.A.4.a.2.I02 | Assist scientists, scholars, or technical specialists with projects or research. |



|   |               |                                                                                 |
|---|---------------|---------------------------------------------------------------------------------|
| 3 | 4.A.4.a.2.I05 | Confer with healthcare or other professionals about patient care.               |
| 3 | 4.A.4.a.2.I07 | Collaborate in the development of educational programs.                         |
| 3 | 4.A.4.a.3.I02 | Provide information or assistance to the public.                                |
| 3 | 4.A.4.a.3.I03 | Provide information to guests, clients, or customers.                           |
| 3 | 4.A.4.a.5.I01 | Assist others to access additional services or resources.                       |
| 3 | 4.A.4.a.5.I02 | Administer therapeutic treatments.                                              |
| 3 | 4.A.4.a.5.I03 | Administer basic health care or medical treatments.                             |
| 3 | 4.A.4.a.5.I04 | Care for plants or animals.                                                     |
| 3 | 4.A.4.a.5.I06 | Fit assistive devices to patients or clients.                                   |
| 3 | 4.A.4.a.5.I07 | Administer emergency medical treatment.                                         |
| 3 | 4.A.4.a.5.I09 | Assist individuals with special needs.                                          |
| 3 | 4.A.4.a.5.I10 | Provide general assistance to others, such as customers, patrons, or motorists. |
| 3 | 4.A.4.a.5.I11 | Assist healthcare practitioners during medical procedures.                      |
| 3 | 4.A.4.a.5.I12 | Treat injuries, illnesses, or diseases.                                         |
| 3 | 4.A.4.a.6.I01 | Advocate for individual or community needs.                                     |
| 3 | 4.A.4.a.6.I02 | Sell products or services.                                                      |
| 3 | 4.A.4.a.8.I03 | Respond to customer problems or inquiries.                                      |
| 3 | 4.A.4.b.3.I01 | Teach life skills.                                                              |
| 3 | 4.A.4.b.3.I02 | Teach academic or vocational subjects.                                          |
| 3 | 4.A.4.b.3.I03 | Teach safety procedures or standards to others.                                 |
| 3 | 4.A.4.b.3.I04 | Train others on operational or work procedures.                                 |
| 3 | 4.A.4.b.3.I06 | Train others on health or medical topics.                                       |
| 3 | 4.A.4.b.4.I02 | Serve on organizational committees.                                             |
| 3 | 4.A.4.b.4.I04 | Manage agricultural or forestry operations.                                     |
| 3 | 4.A.4.b.4.I05 | Supervise activities in correctional facilities.                                |
| 3 | 4.A.4.b.4.I11 | Coordinate group, community, or public activities.                              |
| 3 | 4.A.4.b.4.I13 | Assign work to others.                                                          |
| 3 | 4.A.4.b.4.I16 | Direct legal activities.                                                        |
| 3 | 4.A.4.b.5.I02 | Provide support or encouragement to others.                                     |
| 3 | 4.A.4.b.6.I01 | Advise patients or clients on medical issues.                                   |
| 3 | 4.A.4.b.6.I02 | Advise others on products or services.                                          |
| 3 | 4.A.4.b.6.I06 | Advise others on healthcare or wellness issues.                                 |
| 3 | 4.A.4.b.6.I07 | Advise others on educational or vocational matters.                             |
| 3 | 4.A.4.b.6.I09 | Advise others on workplace health or safety issues.                             |
| 3 | 4.A.4.b.6.I10 | Counsel others about personal matters.                                          |
| 3 | 4.A.4.c.1.I01 | Perform administrative or clerical activities.                                  |
| 3 | 4.A.4.c.1.I02 | Perform court-related or other legal administrative activities.                 |
| 3 | 4.A.4.c.1.I03 | Execute financial transactions.                                                 |
| 3 | 4.A.4.c.1.I04 | Issue documentation.                                                            |
| 3 | 4.A.4.c.1.I05 | Process shipments or mail.                                                      |
| 3 | 4.A.4.c.1.I06 | Process forensic or legal evidence.                                             |
| 3 | 4.A.4.c.3.I01 | Replenish inventories of materials, equipment, or products.                     |
| 3 | 4.A.4.c.3.I02 | Order medical tests or procedures.                                              |
| 3 | 4.A.4.c.3.I03 | Distribute materials, supplies, or resources.                                   |
| 3 | 4.A.4.c.3.I04 | Collect fares or payments.                                                      |
| 3 | 4.A.4.c.3.I05 | Purchase goods or services.                                                     |

|   |               |                                                                                       |
|---|---------------|---------------------------------------------------------------------------------------|
| 3 | 4.A.4.c.3.I06 | Prescribe medical treatments or devices.                                              |
| 3 | 4.A.4.c.3.I07 | Monitor resources or inventories.                                                     |
| 4 | 4.A.1.a.1.I06 | Gather data about operational or development activities.                              |
| 4 | 4.A.1.a.1.I07 | Obtain information about goods or services.                                           |
| 4 | 4.A.1.a.1.I08 | Research issues related to earth sciences.                                            |
| 4 | 4.A.1.a.1.I09 | Research organizational behavior, processes, or performance.                          |
| 4 | 4.A.1.a.1.I10 | Investigate the environmental impact of industrial or development activities.         |
| 4 | 4.A.1.a.1.I13 | Research agricultural processes or practices.                                         |
| 4 | 4.A.1.a.1.I16 | Research biological or ecological phenomena.                                          |
| 4 | 4.A.1.a.1.I17 | Obtain formal documentation or authorization.                                         |
| 4 | 4.A.1.a.1.I20 | Research technology designs or applications.                                          |
| 4 | 4.A.1.a.1.I22 | Investigate organizational or operational problems.                                   |
| 4 | 4.A.1.a.2.I09 | Monitor environmental conditions.                                                     |
| 4 | 4.A.1.a.2.I10 | Monitor operation of computer or information technologies.                            |
| 4 | 4.A.1.a.2.I11 | Monitor operations to ensure compliance with regulations or standards.                |
| 4 | 4.A.1.b.1.I02 | Identify business or organizational opportunities.                                    |
| 4 | 4.A.1.b.2.I02 | Evaluate green technologies or processes.                                             |
| 4 | 4.A.1.b.2.I08 | Test performance of computer or information systems.                                  |
| 4 | 4.A.1.b.3.I02 | Estimate project development or operational costs.                                    |
| 4 | 4.A.2.a.1.I07 | Evaluate the characteristics, usefulness, or performance of products or technologies. |
| 4 | 4.A.2.a.1.I09 | Evaluate condition of financial assets, property, or other resources.                 |
| 4 | 4.A.2.a.1.I10 | Evaluate project feasibility.                                                         |
| 4 | 4.A.2.a.2.I05 | Verify personal information.                                                          |
| 4 | 4.A.2.a.3.I02 | Assess compliance with environmental standards or regulations.                        |
| 4 | 4.A.2.a.4.I01 | Analyze environmental or geospatial data.                                             |
| 4 | 4.A.2.a.4.I02 | Analyze market or industry conditions.                                                |
| 4 | 4.A.2.a.4.I03 | Analyze business or financial risks.                                                  |
| 4 | 4.A.2.a.4.I04 | Analyze scientific or applied data using mathematical principles.                     |
| 4 | 4.A.2.a.4.I05 | Evaluate designs, specifications, or other technical data.                            |
| 4 | 4.A.2.a.4.I07 | Analyze data to improve operations.                                                   |
| 4 | 4.A.2.a.4.I09 | Assess characteristics or impacts of regulations or policies.                         |
| 4 | 4.A.2.a.4.I10 | Analyze biological or chemical substances or related data.                            |
| 4 | 4.A.2.a.4.I11 | Analyze business or financial data.                                                   |
| 4 | 4.A.2.a.4.I12 | Analyze performance of systems or equipment.                                          |
| 4 | 4.A.2.b.1.I03 | Authorize business activities or transactions.                                        |
| 4 | 4.A.2.b.1.I08 | Determine resource needs of projects or operations.                                   |
| 4 | 4.A.2.b.1.I09 | Implement procedures or processes.                                                    |
| 4 | 4.A.2.b.2.I02 | Design computer or information systems or applications.                               |
| 4 | 4.A.2.b.2.I03 | Develop business or marketing plans.                                                  |
| 4 | 4.A.2.b.2.I06 | Design databases.                                                                     |
| 4 | 4.A.2.b.2.I07 | Develop technical specifications for products or operations.                          |
| 4 | 4.A.2.b.2.I08 | Develop plans for managing or preserving natural resources.                           |
| 4 | 4.A.2.b.2.I09 | Develop financial or business plans.                                                  |
| 4 | 4.A.2.b.2.I11 | Design structures or facilities.                                                      |
| 4 | 4.A.2.b.2.I12 | Develop marketing or promotional materials.                                           |
| 4 | 4.A.2.b.2.I16 | Develop systems or practices to mitigate or resolve environmental problems.           |

|   |               |                                                                       |
|---|---------------|-----------------------------------------------------------------------|
| 4 | 4.A.2.b.2.I18 | Create visual designs or displays.                                    |
| 4 | 4.A.2.b.2.I19 | Develop contingency or emergency response plans.                      |
| 4 | 4.A.2.b.2.I20 | Develop sustainable organizational or business policies or practices. |
| 4 | 4.A.2.b.2.I21 | Develop models of systems, processes, or products.                    |
| 4 | 4.A.2.b.2.I23 | Develop research plans or methodologies.                              |
| 4 | 4.A.2.b.2.I24 | Design electrical or electronic systems or equipment.                 |
| 4 | 4.A.2.b.2.I26 | Develop scientific or mathematical theories or models.                |
| 4 | 4.A.2.b.3.I01 | Maintain current knowledge in area of expertise.                      |
| 4 | 4.A.2.b.4.I01 | Develop organizational policies, systems, or processes.               |
| 4 | 4.A.2.b.4.I03 | Develop operational or technical procedures or standards.             |
| 4 | 4.A.3.a.3.I09 | Operate laboratory or field equipment.                                |
| 4 | 4.A.3.b.1.I01 | Program computer systems or production equipment.                     |
| 4 | 4.A.3.b.1.I02 | Implement security measures for computer or information systems.      |
| 4 | 4.A.3.b.1.I03 | Set up computer systems, networks, or other information systems.      |
| 4 | 4.A.3.b.1.I04 | Resolve computer problems.                                            |
| 4 | 4.A.3.b.4.I04 | Maintain electronic, computer, or other technical equipment.          |
| 4 | 4.A.3.b.6.I01 | Prepare financial documents, reports, or budgets.                     |
| 4 | 4.A.3.b.6.I03 | Present research or technical information.                            |
| 4 | 4.A.3.b.6.I07 | Prepare proposals or grant applications.                              |
| 4 | 4.A.3.b.6.I09 | Document technical designs, procedures, or activities.                |
| 4 | 4.A.3.b.6.I14 | Prepare legal or regulatory documents.                                |
| 4 | 4.A.3.b.6.I15 | Prepare reports of operational or procedural activities.              |
| 4 | 4.A.4.a.2.I01 | Communicate environmental or sustainability information.              |
| 4 | 4.A.4.a.2.I04 | Coordinate with others to resolve problems.                           |
| 4 | 4.A.4.a.2.I06 | Communicate with others about business strategies.                    |
| 4 | 4.A.4.a.2.I09 | Communicate with others about specifications or project details.      |
| 4 | 4.A.4.a.2.I11 | Coordinate activities with clients, agencies, or organizations.       |
| 4 | 4.A.4.a.2.I13 | Confer with clients to determine needs or order specifications.       |
| 4 | 4.A.4.a.4.I01 | Develop professional relationships or networks.                       |
| 4 | 4.A.4.a.7.I02 | Negotiate contracts or agreements.                                    |
| 4 | 4.A.4.a.7.I03 | Resolve personnel or operational problems.                            |
| 4 | 4.A.4.b.3.I05 | Train others to use equipment or products.                            |
| 4 | 4.A.4.b.4.I01 | Supervise personnel activities.                                       |
| 4 | 4.A.4.b.4.I06 | Direct scientific or technical activities.                            |
| 4 | 4.A.4.b.4.I07 | Manage human resources activities.                                    |
| 4 | 4.A.4.b.4.I08 | Manage control systems or activities.                                 |
| 4 | 4.A.4.b.4.I09 | Manage budgets or finances.                                           |
| 4 | 4.A.4.b.4.I10 | Direct construction or extraction activities.                         |
| 4 | 4.A.4.b.4.I14 | Coordinate regulatory compliance activities.                          |
| 4 | 4.A.4.b.6.I03 | Advise others on environmental sustainability or green practices.     |
| 4 | 4.A.4.b.6.I04 | Advise others on the design or use of technologies.                   |
| 4 | 4.A.4.b.6.I05 | Advise others on business or operational matters.                     |
| 4 | 4.A.4.b.6.I08 | Advise others on legal or regulatory matters.                         |
| 4 | 4.A.4.b.6.I11 | Advise others on financial matters.                                   |
| 4 | 4.A.4.c.2.I01 | Perform recruiting or hiring activities.                              |

---

## S5. Further statistical analysis

The correlation between skills tightness and GDP per capita remain positive and significant when controlling for MSA population. As correlations are reported in the paper, regressions analysis of GDP Per Capita are reported in Table S0-1.

**Table S5-1. Regressions Explaining MSA GDP Per Capita 2018**

| Variables           | (1)                    | (2)                | (3)               | (4)                    | (5)                | (6)               |
|---------------------|------------------------|--------------------|-------------------|------------------------|--------------------|-------------------|
|                     | Element                | Element (Z-Score)  | Element (Z-Score) | IWA                    | IWA (Z-Score)      | IWA (Z-Score)     |
| Tightness           | 1619.75***<br>(191.11) | 6.09***<br>(0.72)  | 4.74***<br>(0.81) | 7215.51***<br>(752.95) | 6.70***<br>(0.70)  | 5.73***<br>(0.71) |
| Population (Log)    | -                      | -                  | 2.63***<br>(0.75) | -                      | -                  | 3.24***<br>(0.66) |
| Constant            | 43.08***<br>(0.93)     | 48.03***<br>(0.72) | 14.67<br>(9.56)   | 42.85***<br>(0.89)     | 47.95***<br>(0.71) | 6.79<br>(8.43)    |
| Observations        | 382                    | 382                | 382               | 382                    | 382                | 382               |
| Adj. R <sup>2</sup> | 0.16                   | 0.16               | 0.18              | 0.19                   | 0.19               | 0.24              |

Note: Standard errors are shown in parentheses, \*\*\*p < 0.01, \*\*p < 0.05, \*p < 0.1.

## Supplemental References

1. Blondel VD, Guillaume J-L, Lambiotte R, Lefebvre E. Fast unfolding of communities in large networks. *Journal of Statistical Mechanics: Theory and Experiment*. 2008; 2008(10):P10008.
2. de Nooy W, Mrvar A, Batagelj V. *Exploratory Social Network Analysis with Pajek*, 2nd Ed. Granovetter M, editor. New York, NY: Cambridge University Press; 2011.
3. National Center for O\*NET Development. O\*NET OnLine. Available at: <https://www.onetonline.org/>; 2020
4. U.S. Bureau of Labor Statistics. Occupational Employment Survey. Available at: <http://www.bls.gov/oes/>; 2018
5. Office of Management and Budget. OMB Bulletin No. 20-01: Revised Delineations of Metropolitan Statistical Areas, Micropolitan Statistical Areas, and Combined Statistical Areas, and Guidance on Uses of the Delineations of These Areas. Washington, DC; 2020.
